# Supplementary material for: Identification of Potential Osteoporosis miRNA Biomarkers Using Bioinformatics Approaches
Source: Hindawi journal article supplement (doi:10.1155/2021/3562942), 2021-11-02
Supplement: f1 [file 3562942.f1.pdf]

| ID       | logFC    | AveExpr  | t        | P.Value  | adj.P.Val | B        |
|----------|----------|----------|----------|----------|-----------|----------|
| RAB2A    | -0.20751 | 7.743602 | -6.15735 | 2.70E-08 | 0.000224  | 8.684634 |
| VPS35    | 0.255939 | 10.5578  | 6.001193 | 5.26E-08 | 0.000224  | 8.073276 |
| FOXO3    | 0.27449  | 9.042238 | 5.996645 | 5.37E-08 | 0.000224  | 8.055552 |
| TRIM44   | 0.201728 | 8.617078 | 5.82229  | 1.12E-07 | 0.000353  | 7.379525 |
| DPP8     | 0.330156 | 8.94489  | 5.702524 | 1.86E-07 | 0.000399  | 6.9194   |
| POGLUT1  | 0.230218 | 7.830905 | 5.696431 | 1.91E-07 | 0.000399  | 6.896092 |
| SKAP2    | 0.137709 | 8.473858 | 5.366693 | 7.46E-07 | 0.001336  | 5.649775 |
| METTL4   | 0.133111 | 6.203244 | 5.290619 | 1.02E-06 | 0.001594  | 5.366769 |
| TNPO3    | 0.142207 | 7.946679 | 5.157916 | 1.74E-06 | 0.002421  | 4.877513 |
| C15orf49 | -0.14475 | 6.720479 | -4.9694  | 3.68E-06 | 0.004617  | 4.192732 |
| NIF3L1   | 0.215237 | 8.523611 | 4.919132 | 4.49E-06 | 0.004794  | 4.012261 |
| GMEB1    | -0.1435  | 7.646675 | -4.9136  | 4.59E-06 | 0.004794  | 3.992442 |
| RPL3     | 0.132579 | 12.73896 | 4.854041 | 5.79E-06 | 0.005587  | 3.779983 |
| GLT8D2   | 0.124023 | 6.552365 | 4.824309 | 6.50E-06 | 0.005826  | 3.674418 |
| HLA-DMB  | 0.217229 | 11.81829 | 4.78577  | 7.55E-06 | 0.006046  | 3.538089 |
| MSL3     | 0.116346 | 7.923739 | 4.780396 | 7.71E-06 | 0.006046  | 3.519123 |
| MEX3D    | 0.075186 | 5.426001 | 4.72426  | 9.58E-06 | 0.006609  | 3.321708 |
| Y16709   | -0.4183  | 11.33502 | -4.71953 | 9.76E-06 | 0.006609  | 3.305122 |
| HIRA     | -0.37346 | 6.390837 | -4.69484 | 1.07E-05 | 0.006609  | 3.218736 |
| DHX35    | 0.108616 | 5.880491 | 4.692659 | 1.08E-05 | 0.006609  | 3.211129 |
| RPL3L    | 0.091411 | 5.876289 | 4.684274 | 1.12E-05 | 0.006609  | 3.181856 |
| FCGR2A   | 0.246079 | 10.01319 | 4.659997 | 1.23E-05 | 0.006609  | 3.097264 |
| ZEB2     | -0.50628 | 7.898739 | -4.65654 | 1.24E-05 | 0.006609  | 3.085226 |
| IL17RA   | -0.25404 | 10.1935  | -4.63891 | 1.33E-05 | 0.006609  | 3.023998 |
| PAPD7    | 0.175854 | 7.974195 | 4.631942 | 1.36E-05 | 0.006609  | 2.99981  |
| MATN4    | -0.16983 | 6.048397 | -4.62361 | 1.41E-05 | 0.006609  | 2.970928 |
| RCAN2    | 0.086155 | 5.451943 | 4.614656 | 1.46E-05 | 0.006609  | 2.939923 |
| NVL      | 0.155036 | 6.86589  | 4.611593 | 1.47E-05 | 0.006609  | 2.929325 |
| THOC2    | 0.175115 | 7.96957  | 4.546584 | 1.89E-05 | 0.007958  | 2.705321 |
| LIMK2    | -0.11864 | 6.228263 | -4.54443 | 1.90E-05 | 0.007958  | 2.697946 |
| CBX5     | -0.11772 | 6.579076 | -4.52593 | 2.04E-05 | 0.008259  | 2.634539 |
| ADSL     | 0.141489 | 9.192967 | 4.50831  | 2.18E-05 | 0.00855   | 2.574283 |
| UBE2E1   | -0.19426 | 10.44952 | -4.48265 | 2.40E-05 | 0.00913   | 2.486769 |
| TBC1D2   | -0.24863 | 6.559715 | -4.41449 | 3.10E-05 | 0.011432  | 2.255786 |
| SRP19    | -0.19011 | 9.158361 | -4.40473 | 3.21E-05 | 0.011516  | 2.222867 |
| DYNLRB1  | -0.15777 | 9.806531 | -4.38569 | 3.45E-05 | 0.011893  | 2.158805 |
| XDH      | 0.172593 | 7.239791 | 4.374498 | 3.59E-05 | 0.011893  | 2.121203 |
| NELFB    | -0.20356 | 7.627986 | -4.36875 | 3.67E-05 | 0.011893  | 2.101915 |
| LPIN1    | 0.095811 | 6.549144 | 4.366893 | 3.70E-05 | 0.011893  | 2.095694 |
| ZNF37BP  | 0.147521 | 5.517008 | 4.33823  | 4.11E-05 | 0.012689  | 1.999793 |
| NDUFC1   | -0.16247 | 9.352514 | -4.32692 | 4.28E-05 | 0.012689  | 1.962061 |
| ADAM11   | 0.187196 | 6.815365 | 4.325538 | 4.31E-05 | 0.012689  | 1.957448 |
| F7       | -0.23827 | 6.067201 | -4.31646 | 4.45E-05 | 0.012689  | 1.927221 |
| SLC25A14 | 0.117331 | 7.1443   | 4.306722 | 4.62E-05 | 0.012689  | 1.894806 |
| PTMA     | 0.141814 | 11.02493 | 4.301823 | 4.70E-05 | 0.012689  | 1.878526 |
| SLC25A5  | 0.128001 | 11.51742 | 4.298941 | 4.75E-05 | 0.012689  | 1.868951 |
| UTP6     | 0.193938 | 8.726468 | 4.288651 | 4.93E-05 | 0.012689  | 1.834801 |
| C1D      | -0.25638 | 8.615928 | -4.28846 | 4.93E-05 | 0.012689  | 1.834182 |
| EIF3H    | 0.171632 | 10.99127 | 4.28732  | 4.96E-05 | 0.012689  | 1.830389 |
| PHF20    | 0.141922 | 7.459484 | 4.253354 | 5.61E-05 | 0.013288  | 1.718042 |
| EDA      | 0.06162  | 6.076643 | 4.245435 | 5.78E-05 | 0.013288  | 1.691928 |
| CCT5     | 0.180452 | 10.26066 | 4.235586 | 5.99E-05 | 0.013288  | 1.65949  |
| TRPM6    | 0.11356  | 6.310272 | 4.229958 | 6.11E-05 | 0.013288  | 1.640976 |
| EIF2D    | 0.152362 | 8.6916   | 4.225222 | 6.22E-05 | 0.013288  | 1.625407 |
| CHRNA2   | -0.17032 | 6.575639 | -4.21277 | 6.50E-05 | 0.013288  | 1.584515 |
| DHTKD1   | 0.112053 | 5.775504 | 4.210531 | 6.56E-05 | 0.013288  | 1.577182 |
| ARHGEF10 | 0.072786 | 5.729392 | 4.209348 | 6.59E-05 | 0.013288  | 1.573302 |

|                      |          |          |          |          |          |          |
|----------------------|----------|----------|----------|----------|----------|----------|
| CDC42EP3             | -0.2318  | 9.485966 | -4.20645 | 6.65E-05 | 0.013288 | 1.563803 |
| SLC29A3              | 0.152396 | 8.460927 | 4.199317 | 6.83E-05 | 0.013288 | 1.540438 |
| IL1R2                | 0.215547 | 6.204257 | 4.199195 | 6.83E-05 | 0.013288 | 1.540042 |
| UBQLN2               | -0.26237 | 8.349032 | -4.19174 | 7.02E-05 | 0.013288 | 1.515664 |
| EXOSC9               | 0.097737 | 7.590738 | 4.190908 | 7.04E-05 | 0.013288 | 1.512927 |
| POLR2H               | 0.158029 | 8.154057 | 4.187369 | 7.13E-05 | 0.013288 | 1.50136  |
| STMN4                | 0.105701 | 5.604849 | 4.187042 | 7.14E-05 | 0.013288 | 1.500293 |
| SH3GLB2              | -0.2831  | 6.050321 | -4.18619 | 7.16E-05 | 0.013288 | 1.497509 |
| S100A4               | -0.10533 | 12.89468 | -4.18407 | 7.22E-05 | 0.013288 | 1.490577 |
| PAF1                 | -0.14345 | 7.555722 | -4.18294 | 7.25E-05 | 0.013288 | 1.48689  |
| ARID4B               | -0.13078 | 7.276436 | -4.18115 | 7.29E-05 | 0.013288 | 1.48104  |
| KDM4B                | -0.09589 | 7.341225 | -4.17974 | 7.33E-05 | 0.013288 | 1.476445 |
| DESI2                | -0.09478 | 6.352732 | -4.1766  | 7.41E-05 | 0.013288 | 1.466206 |
| UBE2G2               | 0.150963 | 7.854436 | 4.166572 | 7.69E-05 | 0.013395 | 1.433503 |
| GLA                  | 0.186301 | 8.929913 | 4.16423  | 7.75E-05 | 0.013395 | 1.425875 |
| LETMD1               | 0.137577 | 8.049204 | 4.162742 | 7.79E-05 | 0.013395 | 1.421028 |
| HIVEP2               | -0.09432 | 5.706616 | -4.14881 | 8.20E-05 | 0.013664 | 1.375704 |
| RAB11FIP1            | -0.22818 | 9.137347 | -4.14607 | 8.28E-05 | 0.013664 | 1.366827 |
| VHL                  | -0.07062 | 4.844463 | -4.14116 | 8.42E-05 | 0.013664 | 1.350879 |
| DVL1                 | -0.19156 | 6.831801 | -4.13761 | 8.53E-05 | 0.013664 | 1.339342 |
| FIG4                 | 0.138528 | 9.535634 | 4.135964 | 8.58E-05 | 0.013664 | 1.334017 |
| KLF7                 | 0.200242 | 8.066012 | 4.133538 | 8.66E-05 | 0.013664 | 1.326154 |
| FLNC                 | 0.136737 | 6.682225 | 4.131766 | 8.71E-05 | 0.013664 | 1.320407 |
| ABCB7                | 0.158551 | 7.410488 | 4.120393 | 9.08E-05 | 0.013912 | 1.283583 |
| GSAP                 | 0.239244 | 9.650522 | 4.118194 | 9.15E-05 | 0.013912 | 1.276473 |
| HAPLN2               | 0.119092 | 5.896485 | 4.115605 | 9.23E-05 | 0.013912 | 1.2681   |
| ARHGAP4 <sup>4</sup> | -0.06477 | 6.086603 | -4.11315 | 9.31E-05 | 0.013912 | 1.260152 |
| RPL12                | 0.112392 | 12.48612 | 4.104773 | 9.60E-05 | 0.014166 | 1.233115 |
| SNX5                 | 0.166062 | 9.291558 | 4.099232 | 9.79E-05 | 0.014176 | 1.215238 |
| WWP1                 | -0.24854 | 6.637906 | -4.09782 | 9.84E-05 | 0.014176 | 1.210694 |
| ELMO2                | -0.14715 | 8.084069 | -4.09488 | 9.94E-05 | 0.014176 | 1.20121  |
| DMTF1                | 0.30069  | 8.40935  | 4.091322 | 0.000101 | 0.014196 | 1.18975  |
| SEC22B               | -0.35152 | 10.17109 | -4.08643 | 0.000102 | 0.014285 | 1.174009 |
| SLC25A11             | -0.1854  | 7.846115 | -4.07759 | 0.000106 | 0.014468 | 1.145567 |
| CLCA1                | 0.125926 | 6.878671 | 4.076703 | 0.000106 | 0.014468 | 1.142722 |
| PSMD3                | -0.24112 | 6.659917 | -4.05159 | 0.000116 | 0.01565  | 1.062197 |
| EIF3D                | 0.129547 | 10.48914 | 4.047471 | 0.000118 | 0.015712 | 1.049009 |
| NPRL2                | 0.107633 | 7.303408 | 4.043707 | 0.000119 | 0.015755 | 1.036973 |
| POLB                 | 0.143215 | 8.779534 | 4.039063 | 0.000121 | 0.01585  | 1.022133 |
| ADAM17               | -0.15214 | 7.202081 | -4.03199 | 0.000124 | 0.016085 | 0.999548 |
| USP27X               | 0.1087   | 5.77064  | 4.027618 | 0.000126 | 0.016121 | 0.985609 |
| CYP2B7P              | -0.12149 | 7.000215 | -4.02515 | 0.000127 | 0.016121 | 0.977758 |
| BRSK2                | 0.102259 | 5.624758 | 4.022747 | 0.000128 | 0.016121 | 0.970086 |
| MANBA                | 0.162863 | 9.149358 | 4.011777 | 0.000134 | 0.016351 | 0.935169 |
| RNF5                 | -0.13623 | 6.173704 | -4.01014 | 0.000134 | 0.016351 | 0.929963 |
| ATP5C1               | 0.100274 | 10.06638 | 4.007017 | 0.000136 | 0.016351 | 0.920037 |
| BICD2                | -0.16582 | 8.191819 | -4.00559 | 0.000137 | 0.016351 | 0.915508 |
| OPA3                 | -0.12213 | 5.105722 | -4.00492 | 0.000137 | 0.016351 | 0.913382 |
| SMAGP                | 0.141895 | 7.03538  | 3.995669 | 0.000141 | 0.016691 | 0.884007 |
| C6orf48              | 0.149924 | 10.07307 | 3.993718 | 0.000142 | 0.016691 | 0.877821 |
| BAZ2A                | -0.08529 | 7.08599  | -3.99095 | 0.000144 | 0.016699 | 0.869057 |
| NIT2                 | 0.194554 | 7.192714 | 3.987329 | 0.000146 | 0.016758 | 0.857573 |
| SMCP                 | 0.10619  | 6.851108 | 3.964546 | 0.000158 | 0.017859 | 0.785539 |
| MAN2A1               | 0.249351 | 9.03144  | 3.964027 | 0.000158 | 0.017859 | 0.783901 |
| SOAT2                | -0.1127  | 6.451945 | -3.95757 | 0.000162 | 0.017883 | 0.763524 |
| PSMB4                | 0.159272 | 10.32888 | 3.956617 | 0.000162 | 0.017883 | 0.760534 |
| DAP3                 | 0.14812  | 9.423398 | 3.956034 | 0.000162 | 0.017883 | 0.758696 |
| NFKBIA               | -0.30974 | 11.07148 | -3.95077 | 0.000166 | 0.018058 | 0.742107 |

|           |          |          |          |          |          |          |
|-----------|----------|----------|----------|----------|----------|----------|
| PYGM      | 0.098411 | 5.628853 | 3.944534 | 0.000169 | 0.018297 | 0.722491 |
| GTF3A     | 0.132771 | 10.10289 | 3.933571 | 0.000176 | 0.018849 | 0.68804  |
| NAP1L2    | -0.05921 | 4.750689 | -3.92353 | 0.000182 | 0.019355 | 0.656543 |
| SUPT20H   | 0.080754 | 6.666903 | 3.917561 | 0.000186 | 0.019578 | 0.637845 |
| SAP130    | 0.162098 | 7.743414 | 3.915422 | 0.000187 | 0.019578 | 0.631148 |
| HIPK1     | -0.16103 | 8.909664 | -3.9112  | 0.00019  | 0.019703 | 0.617934 |
| EIF3F     | 0.075446 | 8.269972 | 3.907124 | 0.000193 | 0.019821 | 0.605193 |
| MITF      | -0.14866 | 6.759784 | -3.90447 | 0.000195 | 0.019842 | 0.596901 |
| MFSD10    | -0.31854 | 6.979855 | -3.89712 | 0.0002   | 0.020132 | 0.573956 |
| ZNF236    | -0.06741 | 6.290236 | -3.89564 | 0.000201 | 0.020132 | 0.569346 |
| CCT4      | 0.135877 | 10.45018 | 3.890575 | 0.000204 | 0.020239 | 0.553542 |
| CYSLTR2   | -0.11231 | 5.880922 | -3.88954 | 0.000205 | 0.020239 | 0.550319 |
| INTS5     | -0.09444 | 6.867608 | -3.88336 | 0.000209 | 0.020516 | 0.531061 |
| MSN       | -0.15113 | 11.56592 | -3.87281 | 0.000217 | 0.021114 | 0.498259 |
| THRA      | -0.06098 | 6.191362 | -3.86377 | 0.000224 | 0.021446 | 0.470191 |
| ABR       | -0.18793 | 7.55379  | -3.86277 | 0.000225 | 0.021446 | 0.467095 |
| TTC27     | 0.156714 | 6.48036  | 3.861649 | 0.000226 | 0.021446 | 0.463613 |
| ITPKB     | -0.16288 | 6.970274 | -3.85253 | 0.000233 | 0.021965 | 0.435349 |
| FLT3LG    | -0.11291 | 5.518941 | -3.84647 | 0.000238 | 0.022262 | 0.416584 |
| ACAA2     | 0.102713 | 7.677309 | 3.840855 | 0.000242 | 0.022413 | 0.399242 |
| ARL4C     | 0.1771   | 6.816494 | 3.835784 | 0.000247 | 0.022413 | 0.383579 |
| TMEM126f  | 0.196453 | 9.259727 | 3.835074 | 0.000247 | 0.022413 | 0.381386 |
| ACTN2     | 0.049501 | 5.971254 | 3.834256 | 0.000248 | 0.022413 | 0.378861 |
| NPY       | 0.103014 | 6.146902 | 3.833863 | 0.000248 | 0.022413 | 0.377648 |
| FRAT2     | -0.21766 | 9.499618 | -3.82761 | 0.000254 | 0.022487 | 0.358356 |
| HAMP      | -0.22919 | 5.889421 | -3.8273  | 0.000254 | 0.022487 | 0.357396 |
| JUN       | -0.10419 | 5.649393 | -3.82598 | 0.000255 | 0.022487 | 0.353345 |
| PTAFR     | 0.168264 | 9.185743 | 3.824643 | 0.000256 | 0.022487 | 0.349217 |
| LASP1     | -0.12695 | 10.26747 | -3.81947 | 0.000261 | 0.022507 | 0.33328  |
| HCN2      | -0.07289 | 5.697495 | -3.81904 | 0.000261 | 0.022507 | 0.33197  |
| TSNAX     | -0.23222 | 8.700902 | -3.81642 | 0.000264 | 0.022507 | 0.323889 |
| TTY15     | -0.07459 | 5.353289 | -3.81629 | 0.000264 | 0.022507 | 0.323513 |
| RPL30     | -0.08299 | 13.35114 | -3.81437 | 0.000266 | 0.022507 | 0.317587 |
| FAM129A   | -0.33755 | 8.403508 | -3.81215 | 0.000268 | 0.022527 | 0.310758 |
| WT1-AS    | 0.098055 | 5.983664 | 3.806905 | 0.000272 | 0.022782 | 0.294648 |
| KCNF1     | -0.26821 | 6.269309 | -3.80324 | 0.000276 | 0.022917 | 0.283409 |
| SLC2A3    | -0.25695 | 8.369089 | -3.79884 | 0.00028  | 0.02304  | 0.269891 |
| LRRC23    | 0.152111 | 6.298813 | 3.797831 | 0.000281 | 0.02304  | 0.2668   |
| COMMD3    | 0.129688 | 9.378755 | 3.792912 | 0.000286 | 0.023278 | 0.251721 |
| SLC25A3   | 0.09963  | 11.60416 | 3.788409 | 0.00029  | 0.023291 | 0.237931 |
| AC003989  | 0.102661 | 6.091608 | 3.787225 | 0.000291 | 0.023291 | 0.234307 |
| BOLA1     | 0.095198 | 5.779883 | 3.787109 | 0.000291 | 0.023291 | 0.233951 |
| RP2       | -0.27145 | 8.283676 | -3.7841  | 0.000294 | 0.023382 | 0.224738 |
| FAM216A   | -0.17565 | 6.603982 | -3.78191 | 0.000297 | 0.0234   | 0.21806  |
| POFUT1    | -0.08217 | 5.787591 | -3.78007 | 0.000299 | 0.0234   | 0.212421 |
| WNT1      | 0.104002 | 5.363134 | 3.778165 | 0.0003   | 0.0234   | 0.206598 |
| RTCB      | 0.158758 | 9.122307 | 3.776548 | 0.000302 | 0.0234   | 0.201659 |
| PCSK1N    | 0.105318 | 6.539318 | 3.772902 | 0.000306 | 0.023547 | 0.190524 |
| GDI2      | 0.135358 | 11.50087 | 3.762861 | 0.000317 | 0.024135 | 0.159898 |
| ZNF787    | -0.15639 | 6.580676 | -3.76207 | 0.000317 | 0.024135 | 0.157488 |
| CTC-425F1 | -0.33762 | 8.061371 | -3.75993 | 0.00032  | 0.024165 | 0.150971 |
| DNMBP     | 0.14063  | 7.323967 | 3.75749  | 0.000322 | 0.02422  | 0.143539 |
| C21orf59  | 0.126272 | 8.160363 | 3.746495 | 0.000335 | 0.024992 | 0.1101   |
| FABP3     | -0.06809 | 5.762052 | -3.74317 | 0.000338 | 0.025125 | 0.100014 |
| SLC6A12   | 0.119311 | 6.612222 | 3.734936 | 0.000348 | 0.025684 | 0.075019 |
| CNOT7     | 0.142451 | 9.574049 | 3.732195 | 0.000351 | 0.025772 | 0.066712 |
| NBPF1     | 0.166469 | 10.43923 | 3.728122 | 0.000356 | 0.025978 | 0.054375 |
| VCP       | -0.12154 | 8.502037 | -3.72568 | 0.000359 | 0.026003 | 0.046987 |

|           |          |          |          |          |          |          |
|-----------|----------|----------|----------|----------|----------|----------|
| MAGEB4    | -0.05108 | 5.197157 | -3.72361 | 0.000362 | 0.026003 | 0.040713 |
| SLC7A2    | -0.08408 | 5.424738 | -3.72208 | 0.000363 | 0.026003 | 0.036092 |
| SLC41A3   | 0.140364 | 8.025901 | 3.721032 | 0.000365 | 0.026003 | 0.03292  |
| LMAN2L    | 0.099788 | 8.316064 | 3.712667 | 0.000375 | 0.026483 | 0.007646 |
| RAC1      | 0.180045 | 10.75107 | 3.712273 | 0.000376 | 0.026483 | 0.006456 |
| NUDT6     | -0.08114 | 5.008233 | -3.70253 | 0.000388 | 0.027214 | -0.02294 |
| THEG      | 0.114354 | 7.23977  | 3.693915 | 0.0004   | 0.027859 | -0.04887 |
| TCEB2     | 0.106255 | 9.492133 | 3.688052 | 0.000408 | 0.028257 | -0.0665  |
| IRF8      | 0.176069 | 11.08871 | 3.685647 | 0.000411 | 0.028329 | -0.07373 |
| SRSF8     | 0.122659 | 8.548367 | 3.674769 | 0.000426 | 0.029207 | -0.10638 |
| NCAN      | -0.09284 | 6.030379 | -3.6733  | 0.000428 | 0.029207 | -0.11077 |
| GPR116    | 0.059572 | 5.666179 | 3.670818 | 0.000432 | 0.029291 | -0.11821 |
| SREK1IP1  | -0.12572 | 5.696524 | -3.66501 | 0.00044  | 0.029706 | -0.1356  |
| ZIC1      | 0.085708 | 5.40726  | 3.662438 | 0.000444 | 0.029803 | -0.1433  |
| KCNC1     | 0.095261 | 6.288457 | 3.659736 | 0.000448 | 0.029913 | -0.15138 |
| PLG       | 0.09296  | 5.791596 | 3.65501  | 0.000455 | 0.030229 | -0.1655  |
| PAGE4     | -0.08359 | 5.796037 | -3.64811 | 0.000466 | 0.030771 | -0.18609 |
| RAB28     | -0.07948 | 5.680926 | -3.64546 | 0.00047  | 0.030881 | -0.19398 |
| HMGCL     | 0.129541 | 8.608719 | 3.637036 | 0.000484 | 0.031462 | -0.21908 |
| DCLRE1C   | 0.182803 | 7.492517 | 3.635266 | 0.000486 | 0.031462 | -0.22435 |
| HSPB1     | -0.34857 | 6.804692 | -3.6349  | 0.000487 | 0.031462 | -0.22545 |
| TUBA8     | -0.13242 | 5.893522 | -3.63202 | 0.000492 | 0.031462 | -0.23401 |
| FLT3      | 0.195688 | 7.351215 | 3.631236 | 0.000493 | 0.031462 | -0.23634 |
| ATRAID    | 0.123127 | 9.385641 | 3.629868 | 0.000495 | 0.031462 | -0.2404  |
| ZRSR2     | 0.111952 | 8.394922 | 3.628166 | 0.000498 | 0.031462 | -0.24546 |
| SMC1A     | -0.09164 | 7.586978 | -3.62756 | 0.000499 | 0.031462 | -0.24726 |
| RHOF      | 0.134725 | 7.834852 | 3.625528 | 0.000502 | 0.031517 | -0.2533  |
| PSMA7     | 0.174595 | 8.687915 | 3.622942 | 0.000507 | 0.031631 | -0.26097 |
| ABCD4     | 0.08669  | 7.106427 | 3.614762 | 0.000521 | 0.031942 | -0.28523 |
| GATAD2A   | -0.13083 | 6.775548 | -3.61469 | 0.000521 | 0.031942 | -0.28545 |
| GCHFR     | 0.128385 | 6.757149 | 3.61458  | 0.000521 | 0.031942 | -0.28577 |
| GRIN2B    | -0.06124 | 5.794496 | -3.61406 | 0.000522 | 0.031942 | -0.28732 |
| KIZ       | 0.137208 | 6.389289 | 3.611557 | 0.000526 | 0.032052 | -0.29473 |
| LOC10050  | -0.32802 | 5.968338 | -3.60715 | 0.000534 | 0.032367 | -0.30776 |
| RS1       | -0.05886 | 5.442136 | -3.60174 | 0.000544 | 0.032795 | -0.32379 |
| DHX15     | 0.133673 | 10.36526 | 3.600093 | 0.000547 | 0.032795 | -0.32864 |
| PSMA1     | 0.116622 | 10.82614 | 3.598839 | 0.000549 | 0.032795 | -0.33235 |
| CDH16     | 0.114092 | 6.180613 | 3.595244 | 0.000556 | 0.033031 | -0.34296 |
| IFT140    | -0.07735 | 4.970722 | -3.59101 | 0.000563 | 0.033339 | -0.35547 |
| ZNF7      | 0.106072 | 6.022504 | 3.588938 | 0.000567 | 0.03341  | -0.36157 |
| ASTE1     | 0.167035 | 6.587543 | 3.585104 | 0.000574 | 0.033574 | -0.37287 |
| ITCH      | 0.106904 | 6.805307 | 3.584625 | 0.000575 | 0.033574 | -0.37428 |
| INTS8     | 0.208893 | 9.062036 | 3.574875 | 0.000594 | 0.034511 | -0.40297 |
| GH1       | 0.064577 | 6.464008 | 3.573149 | 0.000598 | 0.034548 | -0.40805 |
| SLC22A7   | -0.09956 | 6.007901 | -3.56968 | 0.000604 | 0.034785 | -0.41824 |
| MIA3      | 0.098491 | 7.282626 | 3.562847 | 0.000618 | 0.035414 | -0.4383  |
| YTHDF2    | -0.16791 | 9.197759 | -3.5593  | 0.000625 | 0.035668 | -0.44871 |
| IGBP1     | 0.125633 | 10.01499 | 3.552606 | 0.000639 | 0.036125 | -0.4683  |
| EBLN2     | 0.145969 | 6.830273 | 3.551907 | 0.000641 | 0.036125 | -0.47035 |
| MPZ       | 0.10501  | 6.80969  | 3.550764 | 0.000643 | 0.036125 | -0.4737  |
| TMEM258   | -0.17537 | 10.45607 | -3.5473  | 0.000651 | 0.036125 | -0.48383 |
| IKZF1     | -0.10861 | 7.329126 | -3.54692 | 0.000651 | 0.036125 | -0.48495 |
| ABO       | -0.30071 | 6.094148 | -3.54652 | 0.000652 | 0.036125 | -0.48609 |
| RP11-414f | 0.095684 | 6.277725 | 3.545877 | 0.000654 | 0.036125 | -0.48799 |
| HIST1H2BC | 0.075647 | 5.038746 | 3.543872 | 0.000658 | 0.036204 | -0.49385 |
| LST1      | 0.136881 | 11.31202 | 3.539238 | 0.000668 | 0.036348 | -0.50738 |
| EPB41L4A  | 0.075912 | 5.672429 | 3.538862 | 0.000669 | 0.036348 | -0.50848 |
| IDO1      | 0.164837 | 7.395096 | 3.538671 | 0.000669 | 0.036348 | -0.50904 |

|           |          |          |          |          |          |          |
|-----------|----------|----------|----------|----------|----------|----------|
| RAB40C    | -0.16507 | 6.400666 | -3.53392 | 0.00068  | 0.036536 | -0.5229  |
| VPS37C    | 0.121311 | 8.821191 | 3.533324 | 0.000681 | 0.036536 | -0.52464 |
| SLC6A13   | 0.140773 | 7.783287 | 3.532387 | 0.000683 | 0.036536 | -0.52737 |
| NUP50     | 0.142267 | 7.781736 | 3.531857 | 0.000684 | 0.036536 | -0.52891 |
| NF2       | -0.04363 | 5.563532 | -3.52307 | 0.000704 | 0.037441 | -0.55449 |
| FOXO1     | -0.11622 | 7.434748 | 3.51911  | 0.000713 | 0.037769 | -0.56602 |
| TMBIM6    | 0.117019 | 10.93161 | 3.516189 | 0.00072  | 0.037832 | -0.57451 |
| APPL1     | -0.23486 | 6.432585 | -3.51567 | 0.000722 | 0.037832 | -0.57602 |
| TXLNG     | -0.09616 | 5.608093 | -3.51373 | 0.000726 | 0.037832 | -0.58165 |
| GOLPH3    | -0.15014 | 9.802413 | -3.51286 | 0.000728 | 0.037832 | -0.58417 |
| PDE8A     | 0.143832 | 7.419281 | 3.511584 | 0.000731 | 0.037832 | -0.58788 |
| BMP4      | 0.125178 | 7.499183 | 3.509818 | 0.000735 | 0.037832 | -0.59301 |
| EPN3      | 0.088829 | 5.304196 | 3.509678 | 0.000736 | 0.037832 | -0.59342 |
| AKT3      | -0.08953 | 6.115786 | -3.50695 | 0.000742 | 0.037877 | -0.60132 |
| PCYOX1L   | 0.15941  | 8.180091 | 3.505307 | 0.000746 | 0.037877 | -0.60609 |
| CYP4F2    | -0.08861 | 6.45902  | -3.50482 | 0.000748 | 0.037877 | -0.60751 |
| GPR4      | 0.070599 | 5.987335 | 3.504327 | 0.000749 | 0.037877 | -0.60893 |
| FST       | 0.081359 | 6.914799 | 3.501936 | 0.000755 | 0.038019 | -0.61586 |
| SPATA2L   | -0.19628 | 6.969043 | -3.49749 | 0.000766 | 0.038107 | -0.62873 |
| ZFC3H1    | 0.194122 | 8.914181 | 3.497003 | 0.000767 | 0.038107 | -0.63015 |
| PLCB3     | -0.18212 | 6.764817 | -3.49679 | 0.000767 | 0.038107 | -0.63075 |
| HMOX1     | -0.29068 | 8.687179 | -3.49602 | 0.000769 | 0.038107 | -0.63299 |
| CBR3      | 0.080047 | 6.22167  | 3.495051 | 0.000772 | 0.038107 | -0.63579 |
| RPS6KA2   | -0.08644 | 6.411302 | -3.49288 | 0.000777 | 0.038107 | -0.64207 |
| TP53TG1   | -0.0848  | 5.998451 | -3.49149 | 0.000781 | 0.038107 | -0.64611 |
| PAFAH2    | 0.081767 | 6.194093 | 3.490087 | 0.000784 | 0.038107 | -0.65015 |
| MXD3      | -0.13269 | 7.401737 | -3.48947 | 0.000786 | 0.038107 | -0.65194 |
| IMP3      | 0.14828  | 8.617638 | 3.489123 | 0.000787 | 0.038107 | -0.65293 |
| GNMT      | 0.113166 | 5.928385 | 3.4817   | 0.000806 | 0.038808 | -0.67437 |
| LOC101921 | 0.105612 | 6.866367 | 3.479824 | 0.000811 | 0.038808 | -0.67978 |
| RRP1B     | -0.10678 | 7.511842 | -3.47939 | 0.000812 | 0.038808 | -0.68103 |
| ATP2B4    | -0.08977 | 7.869961 | -3.47878 | 0.000814 | 0.038808 | -0.6828  |
| GRIP2     | 0.119908 | 7.317339 | 3.477102 | 0.000818 | 0.038872 | -0.68762 |
| PRDM4     | 0.078915 | 7.255926 | 3.474047 | 0.000826 | 0.038918 | -0.69643 |
| ERICH1    | 0.114545 | 6.300552 | 3.473372 | 0.000828 | 0.038918 | -0.69837 |
| RIPK2     | 0.100762 | 7.694494 | 3.472618 | 0.00083  | 0.038918 | -0.70054 |
| SDHA      | 0.104979 | 9.508454 | 3.472097 | 0.000831 | 0.038918 | -0.70204 |
| UBE3C     | -0.16141 | 6.987987 | -3.46918 | 0.000839 | 0.039141 | -0.71044 |
| NES       | 0.082234 | 6.678274 | 3.467571 | 0.000844 | 0.039199 | -0.71507 |
| OPHN1     | -0.3378  | 9.175427 | -3.46412 | 0.000853 | 0.039302 | -0.72499 |
| SST       | 0.090392 | 6.024149 | 3.463339 | 0.000855 | 0.039302 | -0.72724 |
| EFCC1     | 0.132171 | 6.603341 | 3.463224 | 0.000856 | 0.039302 | -0.72757 |
| TNFSF11   | 0.057616 | 5.235795 | 3.462214 | 0.000858 | 0.039302 | -0.73047 |
| OAZ3      | 0.066535 | 5.587586 | 3.459076 | 0.000867 | 0.039417 | -0.73948 |
| VSIG4     | 0.218019 | 7.558297 | 3.459061 | 0.000867 | 0.039417 | -0.73953 |
| COQ6      | 0.101419 | 6.721702 | 3.454873 | 0.000879 | 0.03976  | -0.75155 |
| RAB40B    | -0.10885 | 5.615063 | -3.45414 | 0.000881 | 0.03976  | -0.75364 |
| RNF11B    | 0.049361 | 4.991334 | 3.448887 | 0.000896 | 0.040295 | -0.76871 |
| TSPAN9    | -0.08015 | 6.729772 | -3.44734 | 0.000901 | 0.040352 | -0.77314 |
| N4BP3     | -0.08263 | 5.810245 | -3.44049 | 0.000921 | 0.04091  | -0.79274 |
| LOC101922 | -0.10041 | 5.528252 | -3.44014 | 0.000922 | 0.04091  | -0.79375 |
| AGBL3     | -0.04759 | 4.727049 | -3.43977 | 0.000923 | 0.04091  | -0.79482 |
| EGFR      | 0.054277 | 6.563734 | 3.435897 | 0.000934 | 0.041277 | -0.80588 |
| PKLR      | -0.07505 | 6.143174 | -3.43108 | 0.000949 | 0.041651 | -0.81964 |
| KCNK10    | -0.15417 | 5.88226  | -3.43091 | 0.000949 | 0.041651 | -0.82011 |
| LPO       | 0.094644 | 6.385714 | 3.425189 | 0.000967 | 0.042235 | -0.83644 |
| MPHOSPH   | 0.143161 | 7.237005 | 3.42441  | 0.00097  | 0.042235 | -0.83866 |
| CHMP7     | -0.13191 | 7.616562 | -3.42332 | 0.000973 | 0.042236 | -0.84177 |

|           |          |          |          |          |          |          |
|-----------|----------|----------|----------|----------|----------|----------|
| RPLP0     | 0.092612 | 12.55443 | 3.420803 | 0.000981 | 0.042432 | -0.84894 |
| MAP3K3    | 0.196165 | 7.890379 | 3.416842 | 0.000993 | 0.042827 | -0.86021 |
| CTSD      | -0.33118 | 8.531537 | -3.41549 | 0.000998 | 0.042865 | -0.86406 |
| CD320     | 0.139548 | 7.595893 | 3.41403  | 0.001002 | 0.042875 | -0.86821 |
| GSTK1     | 0.175889 | 10.23532 | 3.412719 | 0.001007 | 0.042875 | -0.87194 |
| SCD5      | -0.43604 | 6.335566 | -3.41223 | 0.001008 | 0.042875 | -0.87334 |
| IER2      | -0.33803 | 10.91119 | -3.4083  | 0.001021 | 0.043074 | -0.8845  |
| ORC3      | 0.130713 | 6.65092  | 3.407887 | 0.001022 | 0.043074 | -0.88567 |
| RWDD2B    | 0.125313 | 8.38008  | 3.407626 | 0.001023 | 0.043074 | -0.88641 |
| VPS39     | -0.17226 | 7.868242 | -3.40186 | 0.001042 | 0.043728 | -0.90277 |
| TRAP1     | 0.108083 | 8.27576  | 3.399866 | 0.001049 | 0.043862 | -0.90843 |
| EIF3E     | 0.130283 | 11.64947 | 3.398742 | 0.001053 | 0.043873 | -0.91162 |
| SOX21     | 0.110713 | 6.473123 | 3.39675  | 0.001059 | 0.044007 | -0.91726 |
| HLA-DRB6  | 0.091377 | 7.767164 | 3.395548 | 0.001063 | 0.044031 | -0.92067 |
| CASP10    | 0.071801 | 7.185454 | 3.392904 | 0.001072 | 0.044084 | -0.92816 |
| COPS3     | 0.168427 | 8.714074 | 3.392107 | 0.001075 | 0.044084 | -0.93041 |
| CTNNB1    | -0.24985 | 8.494176 | -3.39111 | 0.001079 | 0.044084 | -0.93324 |
| BRD7P3    | 0.098995 | 5.829786 | 3.391062 | 0.001079 | 0.044084 | -0.93337 |
| AKR1A1    | 0.131475 | 9.675051 | 3.388037 | 0.001089 | 0.044367 | -0.94193 |
| ACAP2     | 0.116857 | 7.420386 | -3.38594 | 0.001097 | 0.04452  | -0.94787 |
| TRIM28    | -0.24598 | 8.49513  | -3.38358 | 0.001105 | 0.04459  | -0.95452 |
| SLMO1     | 0.085419 | 6.272938 | 3.383425 | 0.001105 | 0.04459  | -0.95497 |
| KRT15     | -0.11572 | 5.517667 | -3.37925 | 0.00112  | 0.044889 | -0.96675 |
| PRPSAP2   | 0.152089 | 7.96341  | 3.378941 | 0.001121 | 0.044889 | -0.96763 |
| 44085     | -0.07032 | 5.48524  | -3.37802 | 0.001125 | 0.044889 | -0.97024 |
| CYP2W1    | -0.17118 | 5.76618  | -3.37731 | 0.001127 | 0.044889 | -0.97223 |
| FZR1      | -0.10005 | 6.24441  | -3.37589 | 0.001132 | 0.04495  | -0.97623 |
| ACTN1     | -0.19109 | 8.505661 | -3.37478 | 0.001136 | 0.044967 | -0.97937 |
| SLC35D2   | -0.10074 | 6.662939 | -3.3669  | 0.001165 | 0.04586  | -1.00158 |
| TBC1D10B  | -0.1956  | 8.236085 | -3.36579 | 0.001169 | 0.04586  | -1.00469 |
| TMEM161   | 0.077891 | 8.400212 | 3.365628 | 0.00117  | 0.04586  | -1.00515 |
| ZNF91     | 0.261172 | 8.559731 | 3.363658 | 0.001177 | 0.046004 | -1.01069 |
| RUVBL2    | 0.136626 | 8.50302  | 3.36138  | 0.001186 | 0.046145 | -1.0171  |
| GNRHR     | -0.0456  | 5.327403 | -3.36022 | 0.00119  | 0.046145 | -1.02037 |
| CWC25     | 0.105184 | 7.83882  | 3.359763 | 0.001192 | 0.046145 | -1.02164 |
| BCOR      | -0.08113 | 5.40141  | -3.35738 | 0.001201 | 0.046276 | -1.02834 |
| BMP10     | 0.110247 | 6.577269 | 3.356923 | 0.001202 | 0.046276 | -1.02962 |
| APOBEC3F  | -0.16004 | 5.763329 | -3.3545  | 0.001212 | 0.046491 | -1.03644 |
| PTX3      | -0.198   | 5.645913 | -3.35167 | 0.001223 | 0.046766 | -1.04436 |
| ZNF654    | 0.178726 | 6.238139 | 3.347222 | 0.00124  | 0.047208 | -1.05684 |
| RAB32     | 0.126062 | 10.05577 | 3.346783 | 0.001242 | 0.047208 | -1.05807 |
| NKX6-1    | -0.08644 | 5.476859 | -3.34324 | 0.001256 | 0.047474 | -1.06801 |
| MYO9A     | 0.151624 | 7.147416 | 3.340972 | 0.001265 | 0.047474 | -1.07435 |
| ATP5A1    | 0.111831 | 11.91405 | 3.340552 | 0.001266 | 0.047474 | -1.07552 |
| DARS2     | 0.10582  | 7.344659 | 3.33989  | 0.001269 | 0.047474 | -1.07737 |
| ARSF      | 0.094028 | 6.93098  | 3.338652 | 0.001274 | 0.047474 | -1.08084 |
| ZNF771    | 0.051421 | 5.589234 | 3.338118 | 0.001276 | 0.047474 | -1.08233 |
| RP11-473I | -0.12642 | 5.906655 | -3.33802 | 0.001277 | 0.047474 | -1.08259 |
| SNRPG     | -0.15727 | 9.581101 | -3.33743 | 0.001279 | 0.047474 | -1.08426 |
| OXA1L     | 0.125202 | 10.63012 | 3.336187 | 0.001284 | 0.04752  | -1.08773 |
| KEL       | 0.08629  | 6.932127 | 3.332095 | 0.001301 | 0.047996 | -1.09917 |
| RP11-457I | -0.07909 | 6.290435 | -3.32911 | 0.001313 | 0.048308 | -1.10749 |
| C9orf116  | 0.056021 | 5.88177  | 3.328031 | 0.001317 | 0.048331 | -1.11052 |
| MYH14     | -0.10573 | 6.364822 | -3.32061 | 0.001349 | 0.04933  | -1.1312  |
| DDB2      | 0.143455 | 6.641909 | 3.319262 | 0.001354 | 0.049397 | -1.13496 |
| PNRC1     | -0.15556 | 10.98918 | -3.31703 | 0.001364 | 0.049552 | -1.14118 |
| GRK6      | -0.17963 | 8.276263 | -3.31642 | 0.001367 | 0.049552 | -1.14287 |
| RPN2      | 0.141196 | 10.36083 | 3.313962 | 0.001377 | 0.049623 | -1.14972 |

|          |          |          |          |          |          |          |
|----------|----------|----------|----------|----------|----------|----------|
| KLHDC2   | 0.178655 | 7.986277 | 3.313209 | 0.00138  | 0.049623 | -1.15181 |
| TOB2     | -0.17448 | 7.137355 | -3.31141 | 0.001388 | 0.049623 | -1.15682 |
| RHBDF2   | -0.20707 | 7.626083 | -3.31114 | 0.001389 | 0.049623 | -1.15756 |
| COBLL1   | 0.063799 | 5.568212 | 3.309983 | 0.001395 | 0.049623 | -1.16078 |
| BTN2A1   | 0.118404 | 8.480865 | 3.309447 | 0.001397 | 0.049623 | -1.16227 |
| ZNF33B   | 0.115434 | 6.892873 | 3.309092 | 0.001398 | 0.049623 | -1.16326 |
| FAM222B  | 0.091907 | 7.189638 | 3.307702 | 0.001405 | 0.049623 | -1.16712 |
| CAPZA1   | -0.15154 | 10.98012 | -3.3075  | 0.001405 | 0.049623 | -1.16767 |
| PAFAH1B2 | 0.091207 | 5.731233 | 3.306546 | 0.00141  | 0.049623 | -1.17033 |
| ONECUT2  | 0.093412 | 6.245917 | 3.306012 | 0.001412 | 0.049623 | -1.17182 |
