# Supplementary material for: Identification of Potential Osteoporosis miRNA Biomarkers Using Bioinformatics Approaches
Source: Hindawi journal article supplement (doi:10.1155/2021/3562942), 2021-11-02
Supplement: f2 [file 3562942.f2.pdf]

| miRNAs      | primers                                                                       |
|-------------|-------------------------------------------------------------------------------|
| miR-1271-5p | F: 5'-CAGCACTTGGCACCTAGCA-3'<br>R: 5'-TATGGTTGTTCTCCTCTCTGTCTC-3'             |
| miR-132-3p  | F: 5'-GCGCGCGTAACAGTCTACAGC-3'<br>R: 5'-GTCGTATCCAGTGCAGGGTCC-3'              |
| miR-135a-5p | F: 5'-AACCTGCTCGCAGTATTTGAG-3'<br>R: 5'-GCGGCAGTATGGCTTTTTATTCC-3'            |
| miR-135b-5p | F: 5'-GGTATGGCTTTTCATTCCT-3'<br>R: 5'-GCGAGCACAGAATTAATACGAC-3'               |
| miR-153-3p  | F: 5'-ACACTCCAGCTGGGTTGCATAGTCACAAA-3'<br>R: 5'-CAGTGCGTGTCTGGAGT-3'          |
| miR-15a-5p  | F: 5'-CTAAAGAGGCGGCAGGTCCCTC-3'<br>R: 5'-CAAGATGACCTTCCAGTGAC-3'              |
| miR-15b-5p  | F: 5'-TAGCAGCACATCATGGTTTACA-3'<br>R: 5'-TGCGTGTCTGGAGTC-3'                   |
| miR-182-5p  | F: 5'-TTTGGCAATGGTAGAACTCACACT-3'<br>R: 5'-TGGTGCAGGGTCCGAGGTAT-3'            |
| miR-223-3p  | F: 5'-GTGCAGGGTCCGAGGT-3'<br>R: 5'-CGGGCTGTCAGTTTGTCA-3'                      |
| miR-27a-3p  | F: 5'-GGCTTAGCTGCTTGTGA-3'<br>R: 5'-GAACATGTCTGCGTATCTC-3'                    |
| miR-27b-3p  | F: 5'-TCTAGATG CTCC TCCAGAAACCGTGG-3'<br>R: 5'-GAATTCCTTTTCCAGACAGATGTCCGA-3' |
| miR-370-3p  | F: 5'-GCCTGCTGGGGTGGAACTGGT-3'<br>R: 5'-GCAGGGTCCGAGGTATTC-3'                 |
| miR-486-5p  | F: 5'-CTCGCTTCGGCAGCACA-3'<br>R: 5'-ACGCTTCACGAATTTGCGT-3'                    |
| miR-9-5p    | F: 5'-GGGTCTTTGGTTATCTAGC-3'<br>R: 5'-TGCGTGTCTGGAGTC-3'                      |
| miR-96-5p   | F: 5'-ATGCTTTCTCAACTTGTGG-3'<br>R: 5'-TCACCG CTCTTGGCCGTCACA-3'               |
| U6          | F: 5'-GCTCGCTTCGGCAGCACA-3'<br>R: 5'-GAGGTATTCGCACCAGAGGA-3'                  |
