# Supplementary material for: Identification of Potential Osteoporosis miRNA Biomarkers Using Bioinformatics Approaches
Source: Hindawi journal article supplement (doi:10.1155/2021/3562942), 2021-11-02
Supplement: f3 [file 3562942.f3.pdf]

| miRNA           | mRNA   |
|-----------------|--------|
| hsa-let-7a-5p   | WNT1   |
| hsa-let-7e-5p   | WNT1   |
| hsa-miR-1271-5p | FOXO1  |
| hsa-miR-132-3p  | FOXO1  |
| hsa-miR-133b    | EGFR   |
| hsa-miR-135a-5p | FOXO1  |
| hsa-miR-135b-5p | FOXO1  |
| hsa-miR-137     | EGFR   |
| hsa-miR-137     | MITF   |
| hsa-miR-139-5p  | JUN    |
| hsa-miR-148a-3p | WNT1   |
| hsa-miR-148b-3p | WNT1   |
| hsa-miR-152-3p  | WNT1   |
| hsa-miR-153-3p  | FOXO1  |
| hsa-miR-15a-5p  | AKT3   |
| hsa-miR-15a-5p  | FOXO1  |
| hsa-miR-15b-5p  | AKT3   |
| hsa-miR-15b-5p  | FOXO1  |
| hsa-miR-16-5p   | AKT3   |
| hsa-miR-182-5p  | FOXO1  |
| hsa-miR-182-5p  | MITF   |
| hsa-miR-195-5p  | AKT3   |
| hsa-miR-200b-3p | JUN    |
| hsa-miR-200c-3p | JUN    |
| hsa-miR-20b-5p  | AKT3   |
| hsa-miR-216a-5p | MITF   |
| hsa-miR-216b-5p | JUN    |
| hsa-miR-218-5p  | MITF   |
| hsa-miR-22-3p   | WNT1   |
| hsa-miR-223-3p  | FOXO1  |
| hsa-miR-27a-3p  | FOXO1  |
| hsa-miR-27b-3p  | FOXO1  |
| hsa-miR-29a-3p  | AKT3   |
| hsa-miR-29b-3p  | AKT3   |
| hsa-miR-29c-3p  | AKT3   |
| hsa-miR-302b-3p | EGFR   |
| hsa-miR-340-5p  | MITF   |
| hsa-miR-34a-5p  | WNT1   |
| hsa-miR-370-3p  | FOXO1  |
| hsa-miR-381-3p  | NFKBIA |
| hsa-miR-424-5p  | AKT3   |
| hsa-miR-429     | JUN    |
| hsa-miR-486-5p  | FOXO1  |
| hsa-miR-497-5p  | AKT3   |
| hsa-miR-503-5p  | AKT3   |
| hsa-miR-519d-3p | AKT3   |
| hsa-miR-520b    | EGFR   |
| hsa-miR-520e    | EGFR   |
| hsa-miR-6838-5p | AKT3   |
| hsa-miR-7-5p    | AKT3   |
| hsa-miR-7-5p    | EGFR   |
| hsa-miR-875-5p  | EGFR   |
| hsa-miR-9-5p    | FOXO1  |
| hsa-miR-96-5p   | FOXO1  |
| hsa-miR-96-5p   | MITF   |
